# Supplementary material for: Fine Particulate Matter and Incident Cognitive Impairment in the REasons for Geographic and Racial Differences in Stroke (REGARDS) Cohort
Source: PLOS journal article supplement (doi:10.1371/journal.pone.0075001), 2013-09-25
Supplement: S2 (10.1371/journal.pone.0075001.s002) [file journal.pone.0075001.s002]

\*\*\*\*\*

Author: Matthew Shane Loop

Purpose: This program will re-merge the pm  
and cognition data for the project. Details about  
the project can be found on the Regards and Environment  
Wiki page on the SSG Wiki.

\*\*\*\*\*;

```
LIBNAME REGARDS "..\\Data\\regards\\20110401";
LIBNAME PM "..\\Data\\pm";
LIBNAME TEMP "..\\Data\\temperature";
LIBNAME BASE "..\\Data\\regards\\baseline";
LIBNAME FINAL "..\\data";
```

\*\*\*\*\*

Import the relevant REGARDS data and perform the following exclusion criteria:

- \* Exclude those who are not in the cognitive data set (lost to follow-up from baseline)
- \* Exclude those with a missing date for the initial telephone interview
- \* Exclude those with a baseline self-reported stroke
- \* Excluded those with an incident stroke prior to the first SIS assessment
- \* Exclude those with baseline cognitive impairment
- \* Exclude those with only 1 SIS assessment
- \* Exclude those with geo\_scores of 80 or less

\*\*\*\*\*;

\* Import the relevant REGARDS data ;

DATA CALCVARs;

SET REGARDS.CALCVARS;

KEEP ID\_NUM INTDATE BMI RACE GENDER ED\_CAT REGION INCOME\_4CAT

SMOKE Alc\_NIAAA Exercise\_cat Lipidemia\_meds\_labs Diab\_SRMed\_glu

Hyper\_SRmeds\_bp STROKE\_SR AGE URBANGRP CESD;

RUN; \* Read in 30,183 observations;

DATA COG;

SET REGARDS.COGNITIVE\_SIS;

KEEP STROKE1 ID\_NUM INCIDENT\_IMPAIRMENT INCIDENT\_STROKE

INCIDENT\_IMPAIRMENT2 TOTAL\_ASSESS BASELINE\_IMPAIR ASSESS\_INTERVAL;

RUN; \* Read in 29,616 observations;

DATA GEO;

SET BASE.SAS\_GEOCODED;

KEEP ID\_NUM GEO\_SCORE;

RUN;

\* Make ID\_NUM a numeric variable in all of these data sets;

DATA CALC\_NUM;

```

        SET CALCVARs;
        ID = ID_NUM+0;
        DROP ID_NUM;
    RUN;
    DATA CALCVARs;
        SET CALC_NUM;
        ID_NUM = ID;
        DROP ID;
    RUN;
    DATA COG_NUM;
        SET COG;
        ID = ID_NUM+0;
        DROP ID_NUM;
    RUN;
    DATA COG;
        SET COG_NUM;
        ID_NUM = ID;
        DROP ID;
    RUN;
    DATA GEO_NUM;
        SET GEO;
        ID = ID_NUM+0;
        DROP ID_NUM;
    RUN;
    DATA GEO;
        SET GEO_NUM;
        ID_NUM = ID;
        DROP ID;
    RUN;

```

\* Merge calcvars and cog by id\_num;

```

DATA CALC_COG;
    MERGE CALCVARs(IN=A) COG(IN=B);
    BY ID_NUM;
    IF A AND B;
RUN;      * Read in 29,616. 567 lost to follow-up;

```

\* Exclude those with a missing date for the initial telephone interview;

```

DATA HAVEDATE;
    SET CALC_COG;
    IF INTDATE NE .;
RUN; * Read in 29,610 observations. 6 excluded;

```

\* Exclude those with a baseline self-reported stroke or missing data for baseline self-reported stroke;

```

DATA NOSTROKE;

```

```

        SET HAVEDATE;
        IF STROKE_SR = 'N';
RUN;    * Read in 27,660 observations. 1,950 excluded: 97 excluded for missing,
1,853 excluded for baseline stroke.;

```

```

* Exclude those with an incident stroke prior to the first SIS assessment ;
DATA NOINCSTROKE;
    SET NOSTROKE;
    IF INCIDENT_STROKE NE 1;
RUN;    * Read in 27,610 observations. 50 excluded.    ;

```

```

* Exclude those with baseline cognitive impairment;
DATA INTACT;
    SET NOINCSTROKE;
    IF BASELINE_IMPAIR = 0;
RUN;    * Read in 25,311. 2,299 excluded;

```

```

* Exclude those with only 1 SIS assessment;
DATA MULTASSESS;
    SET INTACT;
    IF TOTAL_ASSESS > 1;
RUN;    * Read in 23,875 observations. 1,436 excluded.;

```

```

DATA CALC_COG_GEO;
    MERGE MULTASSESS(IN=A) GEO(IN=B);
    BY ID_NUM;
    IF A AND B;
RUN;

```

\*\*\*\*\*

Now, assign the temperature and PM2.5 exposures, which are the average 1 year exposures leading up to and including the date of the in-home visit.

\*\*\*\*\*;

```

* Assign PM2.5 exposures;
DATA REGARDS_DAY;
    SET CALC_COG_GEO;
    DATE1 = '31Dec2002'd;
    DAY = INTDATE - DATE1;
RUN;
DATA PM;
    SET PM.PM_ALL;
RUN;
DATA pm_all_num;

```

```

        SET pm;
        ARRAY days{*} _numeric_; * Makes a numeric variable for each numeric
variable in the data set, then puts them in an array;
        ARRAY day{3287} _1-_3287; * Creates an array that has all of the days. The
ID variable was created as _0 in the _numeric_ function.;
        DO i=1 TO 3287;
day{i}=days{i+1}; * Makes the value for, say, 03_1 into _1;
        END;
        KEEP ID_NUM _1-_3287;
RUN;
DATA REGARDS_PM;
        MERGE REGARDS_DAY(IN=A) PM_all_num(IN=B);
        BY ID_NUM;
        IF A AND B;
RUN;
                                * Read in 23,864 observations. 11 excluded.;

```

```

DATA PM_AVG;
        SET REGARDS_PM;
        ARRAY MEANS{3287} _1 - _3287;
        PM25=0;
        IF DAY < 365 THEN DO I=1 TO DAY;
                PM25 = MEANS{DAY-I+1}+PM25;
        END;
        ELSE DO K = 1 TO 365;
                PM25 = MEANS{DAY-K+1} + PM25;
        END;
        IF DAY < 365 THEN PM25_AVG = PM25/(DAY);
        ELSE PM25_AVG = PM25/365;
        DROP K I _1 - _3287 DATE1 PM25;
RUN;

```

```

* Assign temperature exposures;
DATA TEMP;
        SET TEMP.MEAN_TEMP_ALL;
RUN;
DATA TEMP_all_num;
        SET TEMP;
        ARRAY days{*} _numeric_; * Makes a numeric variable for each numeric
variable in the data set, then puts them in an array;
        ARRAY day{3287} _1-_3287; * Creates an array that has all of the days. The
ID variable was created as _0 in the _numeric_ function.;
        DO i=1 TO 3287;
day{i}=days{i+1}; * Makes the value for, say, 03_1 into _1;
        END;
        KEEP ID_NUM _1-_3287;

```

RUN;

```
DATA REGARDS_TEMP;  
    MERGE REGARDS_DAY(IN=A) TEMP_all_num(IN=B);  
    BY ID_NUM;  
    IF A AND B;
```

RUN;

```
DATA TEMP_AVG;  
    SET REGARDS_TEMP;  
    ARRAY MEANS{3287} _1 - _3287;  
    TEMP=0;  
    IF DAY < 365 THEN DO I=1 TO DAY;  
        TEMP = MEANS{DAY-I+1}+TEMP;  
    END;  
    ELSE DO K = 1 TO 365;  
        TEMP = MEANS{DAY-K+1} + TEMP;  
    END;  
    IF DAY < 365 THEN TEMP_AVG = TEMP/(DAY);  
    ELSE TEMP_AVG = TEMP/365;  
    DROP K I _1 - _3287 DATE1 TEMP;
```

RUN;

\* Merge the two data sets;

```
DATA PM_COG;  
    MERGE PM_AVG(IN=A) TEMP_AVG(IN=B);  
    BY ID_NUM;  
    IF A AND B;  
    MONTH=MONTH(INTDATE);  
    IF MONTH=4 OR MONTH=5 OR MONTH=6 THEN SEASON="Spring";  
    IF MONTH=7 OR MONTH=8 OR MONTH=9 THEN SEASON="Summer";  
    IF MONTH=10 OR MONTH=11 OR MONTH=12 THEN SEASON="Fall";  
    IF MONTH=1 OR MONTH=2 OR MONTH=3 THEN SEASON="Winter";  
    LAST_COGDATE = INTDATE+ASSESS_INTERVAL;  
    FORMAT LAST_COGDATE DATE9.;  
    IF GEO_SCORE > 80;  
    IF CESD GE 4 THEN DEPRESSED = 1;  
    IF CESD < 4 AND CESD NE . THEN DEPRESSED = 0;  
    IF CESD = . THEN DEPRESSED = .;  
    TEMP_AVG_C = TEMP_AVG - 272.15;
```

RUN; \* Read in 20,150 observations. Excluded 3,714.;

```
DATA FINAL.PM_COG;  
    SET PM_COG;
```

RUN;
